# Supplementary material
Source: Royal Society of Chemistry journal article supplement (https://www.rsc.org/suppdata/dt/1998/3013/h802816.doc)
Supplement: Supplementary file 1 [file h802816.doc]

**Table I**  Powder X-ray diffraction data of KSbV2O8 and RbSbV2O8

| KSbV2O8 |  |  |  | RbSbV2O8 |  |  |
| --- | --- | --- | --- | --- | --- | --- |
| h k l | dobs | dcal | I/Io | dobs | dcal | I/Io |
| 2 0 0 | 7.3114 | 7.3125 | 22 | - | - | - |
| 2 0 1 | 5.5406 | 5.5481 | 40 | 5.6040 | 5.6113 | 40 |
| 0 1 1 | 4.6506 | 4.6575 | 34 | 4.6843 | 4.6849 | 38 |
| 2 1 0 | 4.4113 | 4.4274 | 42 | 4.4360 | 4.4406 | 20 |
| 3 0 1 | 4.2367 | 4.2309 | 13 | - | - | - |
| 1 0 2 | 4.0803 | 4.0887 | 26 | 4.1499 | 4.1583 | 40 |
| 2 1 1 | 3.9207 | 3.9284 | 20 | 3.9475 | 3.9523 | 23 |
| 2 0 2 | 3.6750 | 3.6800 | 46 | 3.7310 | 3.7353 | 44 |
| 4 0 0 | - | - | - | 3.6765 | 3.6805 | 27 |
| 3 1 1 | 3.3606 | 3.3676 | 70 | 3.3854 | 3.3886 | 98 |
| 3 0 2 | - | - | - | 3.2462 | 3.2488 | 22 |
| 2 1 2 | 3.0620 | 3.0692 | 100 | 3.0994 | 3.1059 | 100 |
| 4 1 1 | 2.8701 | 2.8759 | 76 | 2.8879 | 2.8942 | 76 |
| 1 0 3 | - | - | - | 2.8348 | 2.8358 | 32 |
| 3 1 2 | - | - | - | 2.8018 | 2.8061 | 31 |
| 0 2 0 | 2.7779 | 2.7815 | 77 | 2.7766 | 2.7840 | 64 |
| 2 0 3 | - | - | - | 2.6840 | 2.6900 | 22 |
| 2 2 1 | 2.4867 | 2.4865 | 17 | 2.4885 | 2.4939 | 25 |
| 4 2 0 | 2.2096 | 2.2122 | 33 | 2.2153 | 2.2203 | 40 |
| 3 2 2 | 2.0997 | 2.1013 | 10 | 2.1096 | 2.1140 | 27 |
| 5 0 3 | 2.0348 | 2.0372 | 13 | 2.0636 | 2.0625 | 17 |
| 1 1 4 | - | - | - | 1.9986 | 2.0010 | 25 |
| 1 2 3 | 1.9668 | 1.9688 | 20 | 1.9814 | 1.9866 | 27 |
| 7 0 2 | 1.8730 | 1.8757 | 9 | - | - | - |
| 4 0 4 | - | - | - | 1.8665 | 1.8676 | 33 |
| 3 1 4 | 1.8407 | 1.8413 | 21 | - | - | - |
| 2 3 0 | - | - | - | 1.7980 | 1.7996 | 30 |
| 8 0 1 | 1.7890 | 1.7874 | 18 | - | - | - |
| 3 3 1 | - | - | - | 1.6971 | 1.7022 | 29 |
| 2 3 2 | 1.6547 | 1.6560 | 16 | 1.6634 | 1.6656 | 38 |
| 5 1 4 | 1.6436 | 1.6445 | 30 | 1.6611 | 1.6621 | 35 |
| 4 3 1 | 1.6197 | 1.6235 | 13 | 1.6258 | 1.6277 | 22 |
| 7 2 2 | 1.5529 | 1.5551 | 10 | - | - | - |
| 3 1 5 | 1.5434 | 1.5448 | 14 | 1.5662 | 1.5687 | 21 |

**Table II**  Powder X-ray diffraction data of TlSbV2O8

| h k l | dobs | dcal | I/Io |
| --- | --- | --- | --- |
| 0 1 1 | 7.4453 | 7.4589 | 20 |
| 1 1 0 | 4.6847 | 4.6857 | 40 |
| 1 0 -2 | 4.4345 | 4.4362 | 30 |
| 0 2 1 | 4.1519 | 4.1565 | 35 |
| 1 1 -2 | 3.9448 | 3.9493 | 16 |
| 0 2 2 | 3.7260 | 3.7294 | 19 |
| 0 0 4 | 3.6514 | 3.6575 | 33 |
| 1 1 3 | 3.3717 | 3.3753 | 100 |
| 0 2 3 | 3.2385 | 3.2400 | 26 |
| 1 2 2 | 3.0960 | 3.0970 | 98 |
| 1 1 4 | 2.8788 | 2.8803 | 64 |
| 0 3 1 | 2.8298 | 2.8353 | 22 |
| 2 0 0 | 2.7789 | 2.7845 | 66 |
| 0 3 2 | 2.6828 | 2.6879 | 26 |
| 1 3 0 | 2.5653 | 2.5653 | 27 |
| 1 1 5 | 2.4791 | 2.4795 | 17 |
| 2 0 -4 | 2.2124 | 2.2181 | 34 |
| 2 2 3 | 2.1089 | 2.1101 | 27 |
| 0 3 5 | 2.0536 | 2.0562 | 15 |
| 1 4 1 | 1.9997 | 2.0008 | 26 |
| 2 3 1 | 1.9842 | 1.9862 | 34 |
| 2 3 2 | 1.9301 | 1.9330 | 20 |
| 0 2 7 | 1.8810 | 1.8826 | 21 |
| 1 4 -3 | 1.8660 | 1.8668 | 33 |
| 0 0 8 | 1.8282 | 1.8287 | 17 |
| 3 1 3 | 1.6991 | 1.6998 | 25 |
| 1 4 5 | 1.6614 | 1.6616 | 47 |

**Table III** Powder X-ray diffraction data of CsSbV2O8

| h k l | dobs | dcal | I/Io |
| --- | --- | --- | --- |
| 0 2 0 | 8.0740 | 8.0888 | 43 |
| 0 2 1 | 5.7921 | 5.8265 | 34 |
| 1 0 -1 | 4.6847 | 4.6863 | 32 |
| 1 0 1 | 4.6576 | 4.6634 | 30 |
| 1 1 -1 | 4.4993 | 4.5013 | 26 |
| 0 1 2 | 4.0605 | 4.0651 | 44 |
| 0 2 2 | 3.7221 | 3.7274 | 94 |
| 0 4 1 | 3.6388 | 3.6440 | 30 |
| 1 3 -1 | 3.5320 | 3.5372 | 96 |
| 1 3 1 | 3.5215 | 3.5273 | 100 |
| 0 3 2 | 3.3078 | 3.3135 | 43 |
| 1 4 0 | 3.2793 | 3.2841 | 96 |
| 1 2 -2 | 3.1142 | 3.1142 | 64 |
| 1 2 2 | 3.0969 | 3.1007 | 57 |
| 2 0 0 | 2.8077 | 2.8134 | 74 |
| 0 3 3 | 2.4836 | 2.4849 | 32 |
| 1 2 -3 | 2.3972 | 2.3990 | 32 |
| 1 2 3 | 2.3843 | 2.3898 | 25 |
| 0 7 1 | 2.2278 | 2.2283 | 42 |
| 1 6 -2 | 2.1050 | 2.1064 | 51 |
| 1 6 2 | 2.0991 | 2.1022 | 47 |
| 0 6 3 | 1.9417 | 1.9422 | 27 |
| 2 6 -1 | 1.8979 | 1.8979 | 25 |
| 2 6 1 | 1.8948 | 1.8948 | 25 |
| 2 7 1 | 1.7435 | 1.7456 | 23 |
| 3 4 0 | 1.6979 | 1.7015 | 25 |
